# Supplementary material for: The Educational Gradient in Intake of Energy and Macronutrients in the General Adult and Elderly Population: The Tromsø Study 2015–2016
Source: PubMed Central journal article supplement (PMC7911135; doi:10.3390/nu13020405), 2021-01-28
Supplement: nutrients-13-00405-s001.pdf [file nutrients-13-00405-s001.pdf]

**Table S1:** Characteristics of participants included and excluded in the final study sample. The Tromsø Study 2015-2016.

|                                      |                            | Attended Tromsø 7 (N=21,083)           |                            |                      |                            |          |
|--------------------------------------|----------------------------|----------------------------------------|----------------------------|----------------------|----------------------------|----------|
|                                      |                            | Included in final sample<br>(n=11,302) |                            | Excluded<br>(n=9781) |                            |          |
|                                      |                            | n                                      | Mean (SD) or<br>proportion | n                    | Mean (SD) or<br>proportion | <i>p</i> |
| Sex                                  | Women                      | 6043                                   | 53.5                       | 5031                 | 51.4                       | <0.05    |
|                                      | Men                        | 5259                                   | 46.5                       | 4750                 | 48.6                       |          |
| Age (years)                          |                            | 11302                                  | 57.4 (10.8)                | 9781                 | 57.3 (12.1)                | 0.5      |
| Age-groups                           | 40-49 years                | 3256                                   | 28.8                       | 3176                 | 32.5                       | <0.001   |
|                                      | 50-59 years                | 3254                                   | 28.8                       | 2781                 | 28.4                       |          |
|                                      | 60-69 years                | 3131                                   | 27.7                       | 2048                 | 20.9                       |          |
|                                      | 70-79 years                | 1405                                   | 12.4                       | 1271                 | 13.0                       |          |
|                                      | 80+ years                  | 256                                    | 2.3                        | 505                  | 5.2                        |          |
| BMI (kg/m <sup>2</sup> )             |                            | 11274                                  | 27.2 (4.5)                 | 9746                 | 27.5 (4.6)                 | <0.001   |
| BMI-group <sup>a</sup>               | Normal                     | 3749                                   | 33.3                       | 3002                 | 30.8                       | <0.001   |
|                                      | Overweight                 | 4950                                   | 43.9                       | 4252                 | 43.6                       |          |
|                                      | Obesity                    | 2575                                   | 22.8                       | 2492                 | 25.6                       |          |
| Education level <sup>b</sup>         | Primary                    | 2327                                   | 20.6                       | 2469                 | 26.3                       | <0.001   |
|                                      | Upper secondary            | 3064                                   | 27.1                       | 2692                 | 28.6                       |          |
|                                      | Tertiary, short (<4 years) | 2321                                   | 20.5                       | 1687                 | 17.9                       |          |
|                                      | Tertiary, long (≥ 4 years) | 3590                                   | 31.8                       | 2555                 | 27.2                       |          |
| Physical activity level <sup>c</sup> | Sedentary                  | 1439                                   | 13.0                       | 1533                 | 16.5                       | <0.001   |
|                                      | Light                      | 6512                                   | 58.8                       | 5303                 | 57.1                       |          |
|                                      | Moderate                   | 2791                                   | 25.2                       | 2160                 | 23.2                       |          |
|                                      | Vigorous                   | 334                                    | 3.0                        | 298                  | 3.2                        |          |
| Smoking status                       | Never smokers              | 4788                                   | 42.6                       | 3945                 | 40.9                       | <0.001   |
|                                      | Previous smokers           | 5043                                   | 44.8                       | 4207                 | 43.6                       |          |
|                                      | Current smokers            | 1415                                   | 12.6                       | 1489                 | 15.4                       |          |

Differences between the included and excluded participants were tested by Student's t-test (for continuous variables) and Pearson's chi-square test (for categorical variables)

SD, standard deviation. BMI, body mass index.

<sup>a</sup> Normal (BMI < 25.0 kg/m<sup>2</sup>), overweight (BMI 25.0-29.9 kg/m<sup>2</sup>), obesity (BMI ≥ 30 kg/m<sup>2</sup>)

<sup>b</sup> Primary education (up to 10 years), Upper secondary education (minimum 3 years), Tertiary education, short: college/university less than 4 years, Tertiary education, long: college/university 4 years or more.

<sup>c</sup> Exercise and physical activity in leisure time over the last year. Sedentary: reading, watching TV/screen or other sedentary activity, Light: walking, cycling or other forms of exercise at least 4 hours a week, Moderate: participation in recreational sports, heavy gardening, snow shoveling etc. at least 4 hours a week, Vigorous: participation in hard training or sports competitions, regularly several times a week
